# Supplementary material
Source: PubMed Central journal article supplement (PMC4762421)
Supplement: supp_WNL.0000000000002374_Figure_e-1.pdf [file supp_WNL.0000000000002374_Figure_e-1.pdf]

# Individual prevalence map

## A Cortical thickness

FCD Type-I vs. Controls

FCD Type-II vs. Controls

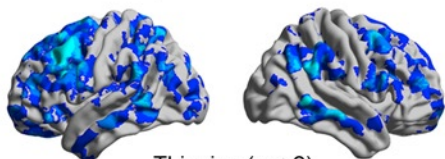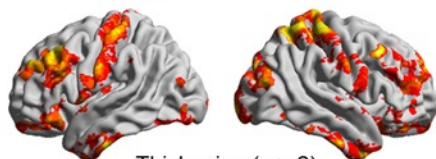

Thinning ( $z < -2$ )

Thickening ( $z > 2$ )

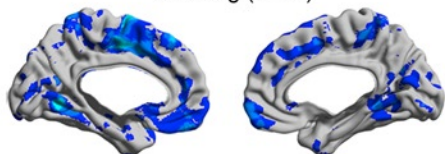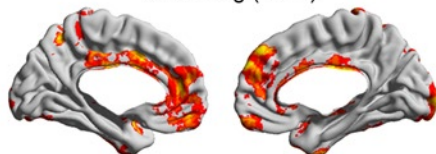

Ipsilateral

Contralateral

proportion (%)

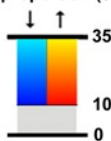

## B Cortical folding complexity

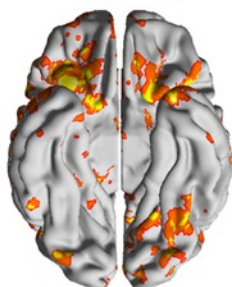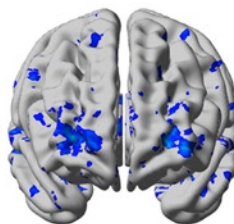

Ipsilateral Contralateral

Ipsilateral Contralateral

Increased complexity ( $z > 2$ )

Decreased complexity ( $z < -2$ )

**Figure e-1. Individual analysis.** At each vertex, the proportion of patients with a thickness (A) and complexity (B) z-score beyond  $\pm 2SD$  relative to controls is shown. Only fractions above 10% are displayed.
